# Supplementary material
Source: publisher figshare collection journal article supplement (https://acs.figshare.com/ndownloader/files/16218572)
Supplement: Supplementary file 1 [file 16218572]

## **Supporting Information**

### **Deep Metabolomics of a High-Grade Serous Ovarian Cancer Triple Knockout Mouse Model.**

Danning Huang<sup>1</sup>, David A. Gaul<sup>1</sup>, Hongmei Nan<sup>2</sup>, Jaeyeon Kim<sup>\*,3</sup>, Facundo M. Fernández<sup>\*,1</sup>

<sup>1</sup>School of Chemistry and Biochemistry, Georgia Institute of Technology, Atlanta, Georgia 30332, United States.

<sup>2</sup>Department of Epidemiology, Richard M. Fairbanks School of Public Health, Indiana University-Purdue University Indianapolis, Indiana University Melvin and Bren Simon Cancer Center, Indianapolis, Indiana, 46202, United States.

<sup>3</sup>Departments of Biochemistry and Molecular Biology, Indiana University School of Medicine, Indiana University Melvin and Bren Simon Cancer Center, Indianapolis, Indiana, 46202, United States.

## **Table of Contents**

**Figure S1.** Multi-group and binary PCA score plots of TKO, TKO-Ctrl and UT samples using initial 5937-feature set and the 29-feature panel.

**Figure S2.** Box plots showing changes of the 29 selected spectral features in TKO-Ctrl, TKO-ET, TKO-AT and UT samples.

**Table S1.** Liquid chromatography gradients for RP and HILIC separation methods.

**Table S2.** MS acquisition parameters.

**Table S3.** GA variable selection parameters.

**Table S4.** Detailed MS/MS annotation of the 29-feature panel.

**Table S5.** Sample cohort information.

Additional discussion on the biological roles of identified features not discussed in main manuscript.

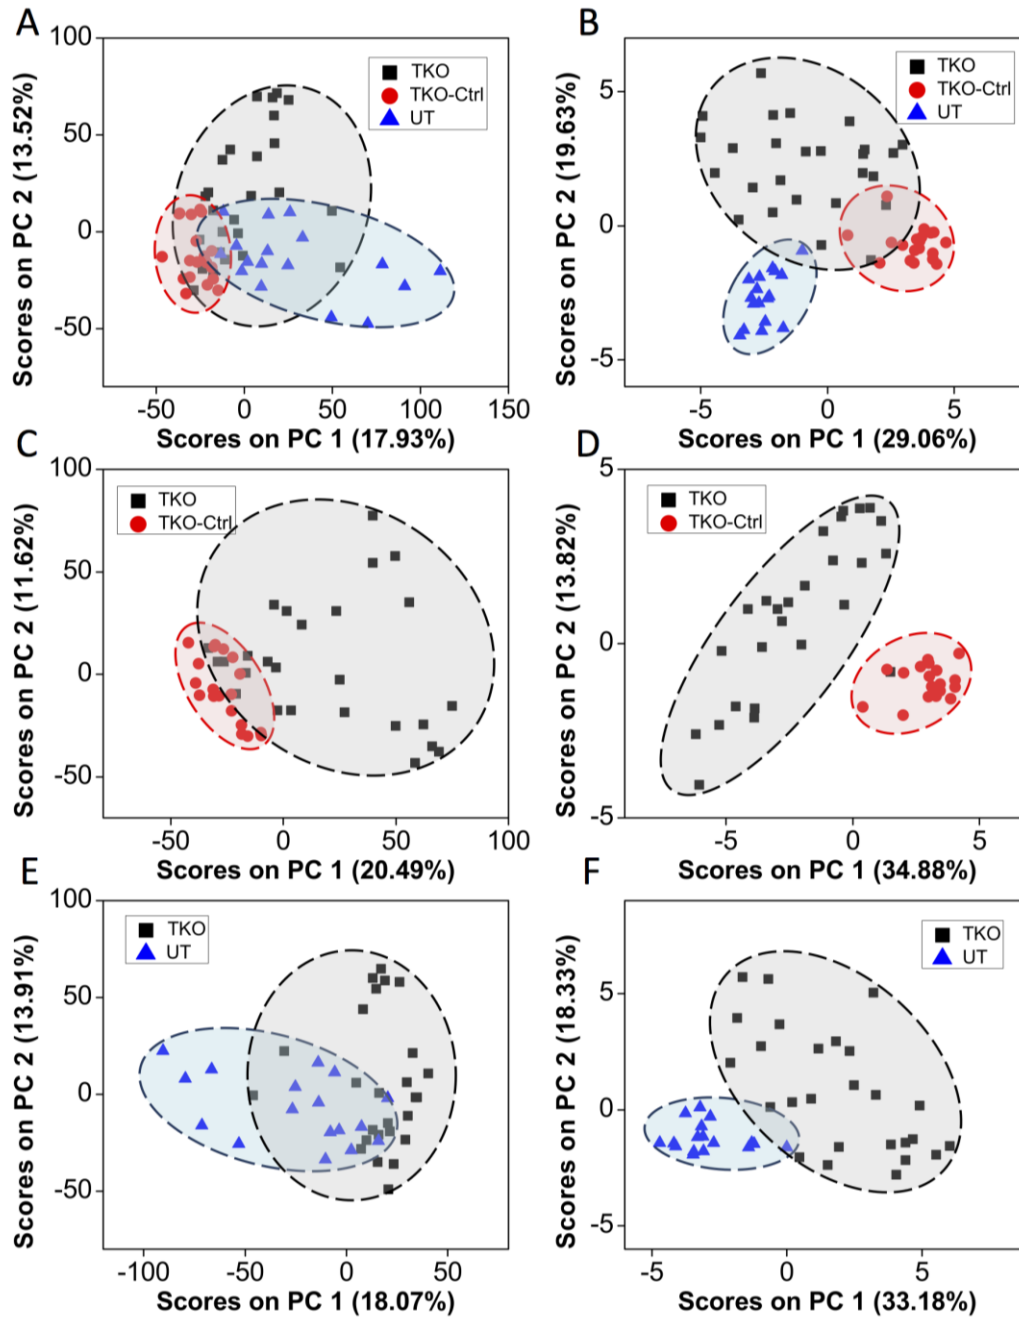

**Supplemental Figure S1.** PCA score plots of TKO, TKO-Ctrl and UT samples using (A) the initial set of 5937 features and (B) the selected 29-feature panel. The distribution of samples reveals that TKO, TKO-Ctrl and UT samples form distinct clusters, and that more variance between classes is captured across the x-axis using the 29-feature panel. Binary PCA score plots of TKO vs. TKO-Ctrl samples using (C) 5937 features and (D) 29 features, and binary PCA score plots of TKO vs.

UT samples using (E) 5937 features and (F) 29 features. Distinct clustering of TKO and TKO-Ctrl samples, or TKO and UT samples is observed in both binary PCA score plots using the 29-feature panel. For all plots, TKO, TKO-Ctrl and UT samples are represented by black squares, red circles and blue triangles, respectively.

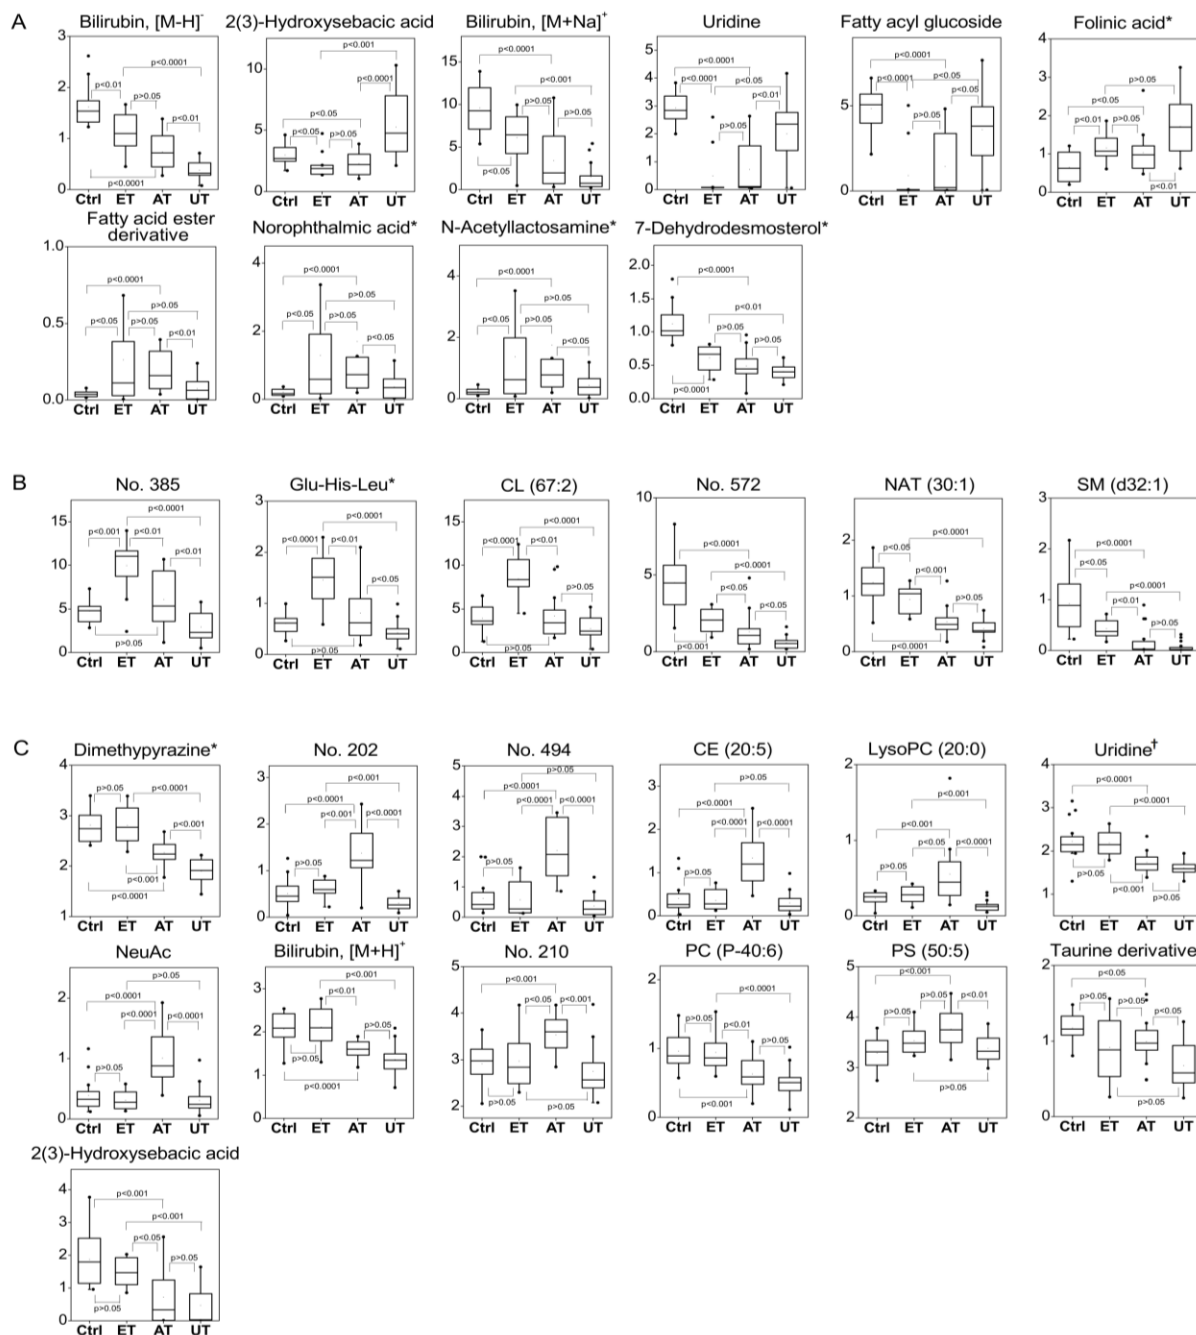

**Supplemental Figure S2.** Box plots showing changes of the 29 selected spectral features in TKO-Ctrl (n=19), ET (n=10), AT (n=16) and UT samples (n=17). Features are divided into 3 groups showing different trends: (A) group showing different abundances between TKO and TKO-Ctrl/UT, but no significant difference among ET and AT, (B) group showing different abundances between TKO and TKO-Ctrl/UT and also a difference among ET and AT, (C) group where abundances for Ctrl and ET are similar to each other, but, different from AT. The mean, median,

upper and lower quartiles, outliers, and minimum and maximum (whiskers) values are displayed. The p-values were calculated with a Mann-Whitney U test. \*Features have isomers; †Feature is an isotopic peak, we attributed this to incomplete de-isotoping of software during data preprocessing. For metabolites without an identity, feature ID numbers are provided.

**Table S1.** Methods information. (S1a) Chromatographic gradient for RP method: mobile phase A was water/acetonitrile (40:60 v/v), and B was acetonitrile/isopropanol (10:90 v/v). Both mobile phases included 10 mM ammonium formate and 0.1% formic acid additives. (S1b) Chromatographic gradient for HILIC method: mobile phase A was water/acetonitrile (95:5 v/v), with 10 mM ammonium acetate and 0.05% ammonium hydroxide, and B was acetonitrile with 0.05% ammonium hydroxide. Both ionization modes utilized identical mobile phases and identical chromatographic gradients.

| <b>(a)</b>                  |          |          |                           | <b>(b)</b>                     |          |          |                           |
|-----------------------------|----------|----------|---------------------------|--------------------------------|----------|----------|---------------------------|
| <b>RP Separation Method</b> |          |          |                           | <b>HILIC Separation Method</b> |          |          |                           |
| <b>Time (min)</b>           | <b>A</b> | <b>B</b> | <b>Flow rate (ml/min)</b> | <b>Time (min)</b>              | <b>A</b> | <b>B</b> | <b>Flow rate (ml/min)</b> |
| 0                           | 60       | 40       | 0.4                       | 0                              | 5        | 95       | 0.3                       |
| 1                           | 55       | 45       | 0.4                       | 3                              | 63       | 37       | 0.3                       |
| 1.1                         | 50       | 50       | 0.4                       | 7                              | 63       | 37       | 0.3                       |
| 5                           | 45       | 55       | 0.4                       | 7.1                            | 5        | 95       | 0.3                       |
| 5.1                         | 30       | 70       | 0.4                       | 7.2                            | 5        | 95       | 0.5                       |
| 8                           | 1        | 99       | 0.4                       | 9.5                            | 5        | 95       | 0.5                       |
| 8.1                         | 60       | 40       | 0.4                       | 9.9                            | 5        | 95       | 0.3                       |
| 9.5                         | 60       | 40       | 0.4                       | 10                             | 5        | 95       | 0.3                       |

**Table S2.** Summary of MS acquisition parameters.

|                          | <b>Positive Mode</b> | <b>Negative Mode</b> |
|--------------------------|----------------------|----------------------|
| Spray Voltage            | 3.0 kV               | -2.8 kV              |
| Capillary Temperature    | 275 ° C              | 275 ° C              |
| Sheath Gas Flow Rate     | 50                   | 50                   |
| Aux Gas Flow Rate        | 14                   | 14                   |
| S-Lens RF Level          | 40.0                 | 40.0                 |
| Probe Heater Temperature | 425 ° C              | 425 ° C              |



**Table S3.** Summary of GA variable selection parameters.

|                               |        |
|-------------------------------|--------|
| Population Size               | 64     |
| Window Width                  | 1      |
| % Initial Terms (variables)   | 30     |
| Target Minimum # of Variables | 5      |
| Target Maximum # of Variables | 30     |
| Penalty Slope                 | 0.01   |
| Max Generations               | 200    |
| % at Convergence              | 50     |
| Mutation Rate                 | 0.005  |
| Crossover                     | Double |
| Regression Choice             | PLS    |
| # of Latent Variables         | 4      |
| Cross-Validation              | Random |
| # of Splits                   | 6      |
| # of Iterations               | 10     |
| Replicate Runs                | 5      |

**Table S4.** Detailed MS/MS information for the 29-feature panel that discriminates TKO from TKO-Ctrl and UT samples. The fragment ions listed in the table were obtained using DDA and PRM experiments. The precursor ions that were selected are underlined. Ions in bold are matched to standard spectra or literature spectra. Confidence in the metabolite identities followed four different levels: 1) accurate mass, isotopic abundances, fragmentation spectrum, and retention time of identified compounds matched to standards; 2) accurate mass, isotopic abundances, and fragmentation spectrum matched to databases or consistent with expected fragmentation patterns in literature; 3) accurate mass matched to Lipid Maps, Human Metabolome Database (HMDB) or Metlin database entry, and/or fragmentation showing a few matching characteristic fragment ions, such as lipid head group; and 4) unknown compound.

| <i>Feature ID</i> | <i>CE (eV), Mode</i> | <i>Fragment ion m/z</i>                                                                         | <i>ID confidence level</i> | <i>Match details (Source)</i>                   |
|-------------------|----------------------|-------------------------------------------------------------------------------------------------|----------------------------|-------------------------------------------------|
| 208               | 30 (+)               | <b><u>109.0764</u></b> , <b>82.0659</b> , <b>68.0503</b>                                        | 2                          | Fragmentation consistent with spectrum (Metlin) |
| 202               | 30 (+)               | <u>271.1148</u> , 253.1043, 230.1402, 213.8154, 209.0921, 140.0342, 139.0501                    | 4                          | ---                                             |
| 385               | 10 (-)               | <u>516.7520</u> , 480.7758, 458.7936, 376.8696, 304.7437, 213.0655, 175.0237, 138.8741, 80.9155 | 4                          | ---                                             |
| 277               | 20 (-)               | <b><u>583.2571</u></b> , <b>285.1244</b> , <b>253.1348</b> , 213.3508                           | 2                          | Fragmentation consistent with spectrum (Metlin) |
| 494               | 10 (-)               | <u>514.7540</u> , 478.7776, 456.7957, 376.8695, 302.7457, 175.0238, 136.8763, 78.9175           | 4                          | ---                                             |
| 363               | 20 (+)               | <u>398.2038</u> , 272.1569, 271.1535,                                                           | 4                          | ---                                             |

|     |        |                                                                                                                              |   |                                                                           |
|-----|--------|------------------------------------------------------------------------------------------------------------------------------|---|---------------------------------------------------------------------------|
|     |        | 255.1586, 165.0908, 133.0858,<br>120.0890, 119.0856, 89.0602                                                                 |   |                                                                           |
| 427 | 30 (+) | <u>693.5573</u> , 369.3513, 325,2135,<br>243.2103, 175.1480, 161.1323,<br>147.1167, 135.1167, 121.1013,<br>109.1016, 95.0860 | 2 | Fragmentation<br>consistent with<br>structure                             |
| 303 | 20 (+) | <b><u>552.4017</u>, 534.3914, 369.3360,<br/>258.1099, 184.0732, 104.1074,<br/>86.0970</b>                                    | 2 | Fragmentation<br>consistent with<br>spectrum (Metlin)                     |
| 751 | 10 (+) | <u>696.4980</u> , 687.9850, 159.1377                                                                                         | 3 | Tentative<br>identification based<br>on m/z and isotopic<br>peak patterns |
| 37  | 30 (-) | <u>217.1076</u> , 199.0971, 185.0811,<br>167.0704, 141.0910, 123.0804,<br>113.0232, 85.0646, 69.0333,<br>57.0332             | 2 | Fragmentation<br>consistent with<br>structure                             |
| 572 | 10 (+) | <u>454.8895</u> , 372.8866, 356.9127,<br>332.8942, 290.8837, 274.9097                                                        | 4 | ---                                                                       |
| 651 | 30 (-) | <b>243.0619, 200.0509, 140.0340,<br/>111.0187, 110.0233</b>                                                                  | 2 | Fragmentation<br>consistent with<br>spectrum (Metlin)                     |
| 557 | 10 (-) | <b><u>308.0986</u>, 215.9518, 170.0447,<br/>119.0337, 87.0074</b>                                                            | 2 | Fragmentation<br>consistent with<br>spectrum (Metlin)                     |
| 88  | 20 (+) | <u>607.2506</u> , 547.3555, 321.1208,<br>309,1207, 277.1309, 212.8769                                                        | 2 | Fragmentation<br>consistent with<br>structure                             |
| 274 | ---    | ---                                                                                                                          | 3 | Tentative<br>identification based                                         |

|     |        |                                                                                                  |   |                                                                  |
|-----|--------|--------------------------------------------------------------------------------------------------|---|------------------------------------------------------------------|
|     |        |                                                                                                  |   | on m/z and isotopic peak patterns                                |
| 696 | 30 (-) | <b>243.0617, 200.0556, 111.0187, 110.0235</b>                                                    | 2 | Fragmentation consistent with spectrum (Metlin)                  |
| 449 | ---    | ---                                                                                              | 3 | Tentative identification based on m/z and isotopic peak patterns |
| 189 | 30 (+) | <b><u>585.2705</u>, 299.1390</b>                                                                 | 2 | Fragmentation consistent with spectrum (Metlin)                  |
| 210 | 10 (+) | <u>619.1966</u> , 559.1757, 537.1939, 500.1024, 456.0761, 362.0945, 280.0915, 207.2064, 104.1073 | 4 | ---                                                              |
| 98  | 10 (-) | <u>247.1182</u> , 209.0788, 167.0200, 143.0338, 119.0337, 101.0232, 89.0231, 81.0333             | 2 | Fragmentation consistent with structure                          |
| 191 | 30 (+) | <u>818.6043</u> , 184.0734, 125.0000, 86.071                                                     | 3 | Fragmentation consistent with PC headgroup                       |
| 485 | ---    | ---                                                                                              | 3 | Tentative identification based on m/z and isotopic peak patterns |
| 700 | ---    | ---                                                                                              | 3 | Tentative identification based on m/z and isotopic peak patterns |
| 22  | 10 (-) | <u>491.3413</u> , 433.2628, 213.2263                                                             | 3 | Accurate mass match                                              |

|     |        |                                                                                                                                                                |   |                                                                     |
|-----|--------|----------------------------------------------------------------------------------------------------------------------------------------------------------------|---|---------------------------------------------------------------------|
|     |        |                                                                                                                                                                |   | (Lipid Maps)                                                        |
| 644 | 30 (+) | <b><u>276.1190</u></b> , <b>147.0764</b> , <b>130.0499</b> ,<br>115.0392, <b>102.0554</b> , <b>101.0715</b> ,<br>85.0291, <b>84.0450</b>                       | 2 | Fragmentation<br>consistent with<br>spectrum (Metlin)               |
| 725 | 10 (-) | <u>219.0187</u> , 176.0126, 149.0015,<br>124.0062, 80.9639                                                                                                     | 3 | Fragment peaks<br>124.0062 and<br>80.9639 match<br>taurine (Metlin) |
| 48  | 20 (-) | <u>462.0589</u> , 427.0899, 213.2762,<br>160.8410                                                                                                              | 3 | Accurate mass match<br>(HMDB)                                       |
| 772 | 30 (-) | <b><u>217.1076</u></b> , <b>199.0683</b> , <b>181.0858</b> ,<br>174.9916, <b>155.1068</b> , 137.0962,<br><b>127.1115</b> , 96.9589, 83.0489,<br><b>59.0125</b> | 2 | Fragmentation<br>consistent with<br>spectrum (HMDB)                 |
| 29  | 30 (+) | <b><u>383.3307</u></b> , <b>95.0861</b> , <b>81.0706</b>                                                                                                       | 2 | Fragmentation<br>consistent with<br>spectrum (Metlin)               |

**Table S5.** Sample cohort information. Two repeatedly misclassified samples were collected from a TKO-ET mouse: No. 42, and a UT mouse: No. 68. The oPLS-DA classification model was classifying TKO-ET mouse labeled No.42 as a TKO-Ctrl mouse. This could be due to the age of the mouse, 2.5m when sample was collected, was much younger than the rest of the TKO-ET mice (average age: 4.8m) and close to the average age of the TKO-Pre mice (average age: 2.0m). As TKO-Pre mice were phenotypically closer to the TKO-Ctrl mice, this may explain why the young TKO-ET mouse was classified as a TKO-Ctrl mouse in the models. For the other misclassified sample collected from UT mouse No.68, we couldn't identify the potential reason based on the mice information we had.

|    |          |          |           | Breeding | Genotype |       |       |       | Age    | Age  | Dead or    | Tumor |       |
|----|----------|----------|-----------|----------|----------|-------|-------|-------|--------|------|------------|-------|-------|
|    | Tail No. | DOB      | Color/Ear | Cage     | p53      | Pten  | Dicer | Amhr2 | (days) | (Mo) | collection | stage | Serum |
| 1  | 716      | 10/5/13  | Bl/-      | PmPtDA29 | R172H/+  | fl/fl | fl/fl | cre/+ | 80     | 2.7  | 12/24/13   | pre   | Y     |
| 2  | 703      | 10/7/13  | Bl/-      | PmPtDA33 | R172H/+  | fl/fl | fl/fl | cre/+ | 78     | 2.6  | 12/24/13   | pre   | Y     |
| 3  | 711      | 10/11/13 | Bl/-      | PmPtDA36 | R172H/+  | fl/fl | fl/fl | cre/+ | 75     | 2.5  | 12/25/13   | pre   | Y     |
| 4  | 715      | 10/11/13 | Wh/R      | PmPtDA36 | R172H/+  | fl/fl | fl/fl | cre/+ | 75     | 2.5  | 12/25/13   | pre   | Y     |
| 5  | 694      | 10/17/13 | Br/-      | PmPtDA32 | R172H/+  | fl/fl | fl/fl | cre/+ | 69     | 2.3  | 12/25/13   | pre   | Y     |
| 6  | 695      | 10/17/13 | Br/-      | PmPtDA32 | R172H/+  | fl/fl | fl/fl | cre/+ | 69     | 2.3  | 12/25/13   | pre   | Y     |
| 7  | 705      | 10/17/13 | Bl/R      | PmPtDA34 | R172H/+  | fl/fl | fl/fl | cre/+ | 69     | 2.3  | 12/25/13   | pre   | Y     |
| 8  | 709      | 10/19/13 | Br/L      | PmPtDA35 | R172H/+  | fl/fl | fl/fl | cre/+ | 75     | 2.5  | 1/2/14     | pre   | Y     |
| 9  | 796      | 10/3/13  | Br/R      | PmPtDA33 | R172H/+  | fl/fl | fl/fl | cre/+ | 92     | 3.1  | 1/3/14     | pre   | Y     |
| 10 | 860      | 11/7/13  | Br/R      | PmPtDA36 | R172H/+  | fl/fl | fl/fl | cre/+ | 57     | 1.9  | 1/3/14     | pre   | Y     |
| 11 | 861      | 11/7/13  | Br/RR     | PmPtDA36 | R172H/+  | fl/fl | fl/fl | cre/+ | 57     | 1.9  | 1/3/14     | pre   | Y     |
| 12 | 923      | 11/28/13 | Br/-      | PmPtDA33 | R172H/+  | fl/fl | fl/fl | cre/+ | 40     | 1.3  | 1/7/14     | pre   | Y     |
| 13 | 851      | 11/8/13  | Br/R      | PmPtDA32 | R172H/+  | fl/fl | fl/fl | cre/+ | 60     | 2.0  | 1/7/14     | pre   | Y     |
| 14 | 855      | 11/21/13 | Br/-      | PmPtDA33 | R172H/+  | fl/fl | fl/fl | cre/+ | 47     | 1.6  | 1/7/14     | pre   | Y     |
| 15 | 856      | 11/21/13 | Wh/-      | PmPtDA33 | R172H/+  | fl/fl | fl/fl | cre/+ | 47     | 1.6  | 1/7/14     | pre   | Y     |
| 16 | 930      | 11/25/13 | Wh/R      | PmPtDA30 | R172H/+  | fl/fl | fl/fl | cre/+ | 44     | 1.5  | 1/8/14     | pre   | Y     |
| 17 | 922      | 11/28/13 | Bl/L      | PmPtDA33 | R172H/+  | fl/fl | fl/fl | cre/+ | 41     | 1.4  | 1/8/14     | pre   | Y     |
| 18 | 555      | 4/26/14  | Bl/RL     | PmPtDA38 | R172H/+  | fl/fl | fl/fl | cre/+ | 44     | 1.5  | 6/9/14     | pre   | Y     |
| 19 | 568      | 4/24/14  | Bl/R      | PmPtDA31 | R172H/+  | fl/fl | fl/fl | cre/+ | 46     | 1.5  | 6/9/14     | pre   | Y     |
| 20 | 571      | 4/24/14  | Bl/RR     | PmPtDA31 | R172H/+  | fl/fl | fl/fl | cre/+ | 46     | 1.5  | 6/9/14     | pre   | Y     |

|    |      |          |        |          |         |       |       |       |            |            |          |      |   |    |
|----|------|----------|--------|----------|---------|-------|-------|-------|------------|------------|----------|------|---|----|
| 21 | 543  | 4/24/14  | Bl/RLR | PmPtDA35 | R172H/+ | fl/fl | fl/fl | cre/+ | <b>46</b>  | <b>1.5</b> | 6/9/14   | pre  | Y | 22 |
| 22 | 576  | 4/22/14  | Wh/RL  | PmPtDA41 | R172H/+ | fl/fl | fl/fl | cre/+ | <b>48</b>  | <b>1.6</b> | 6/9/14   | pre  | Y |    |
| 23 | 19   | 12/21/13 | Bl/RL  | PmPtDA37 | R172H/+ | fl/fl | fl/fl | +/+   | <b>130</b> | <b>4.3</b> | 4/30/14  | ctrl | Y | 19 |
| 24 | 20   | 12/21/13 | Bl/RR  | PmPtDA37 | R172H/+ | fl/fl | fl/fl | +/+   | <b>130</b> | <b>4.3</b> | 4/30/14  | ctrl | Y |    |
| 25 | 21   | 12/21/13 | Wh/-   | PmPtDA37 | R172H/+ | fl/fl | fl/fl | +/+   | <b>130</b> | <b>4.3</b> | 4/30/14  | ctrl | Y |    |
| 26 | 91   | 1/5/14   | Bl/-   | PmPtDA38 | R172H/+ | fl/fl | fl/fl | +/+   | <b>115</b> | <b>3.8</b> | 4/30/14  | ctrl | Y |    |
| 27 | 112  | 1/8/14   | Bl/R   | PmPtDA36 | R172H/+ | fl/fl | fl/fl | +/+   | <b>112</b> | <b>3.7</b> | 4/30/14  | ctrl | Y |    |
| 28 | 920  | 11/28/13 | Bl/-   | PmPtDA37 | R172H/+ | fl/fl | fl/fl | +/+   | <b>153</b> | <b>5.1</b> | 4/30/14  | ctrl | Y |    |
| 29 | 925  | 11/28/13 | Br/L   | PmPtDA33 | R172H/+ | fl/fl | fl/fl | +/+   | <b>153</b> | <b>5.1</b> | 4/30/14  | ctrl | Y |    |
| 30 | 908  | 12/2/13  | Br/RL  | PmPtDA33 | R172H/+ | fl/fl | fl/fl | +/+   | <b>149</b> | <b>5.0</b> | 4/30/14  | ctrl | Y |    |
| 31 | 911  | 12/2/13  | Bl/R   | PmPtDA32 | R172H/+ | fl/fl | fl/fl | +/+   | <b>149</b> | <b>5.0</b> | 4/30/14  | ctrl | Y |    |
| 32 | 9    | 12/10/13 | Br/-   | PmPtDA34 | R172H/+ | fl/fl | fl/fl | +/+   | <b>141</b> | <b>4.7</b> | 4/30/14  | ctrl | Y |    |
| 33 | 4    | 12/12/13 | Br/RL  | PmPtDA33 | R172H/+ | fl/fl | fl/fl | +/+   | <b>139</b> | <b>4.6</b> | 4/30/14  | ctrl | Y |    |
| 34 | 698  | 5/18/14  | Bl/L   | PmPtDA40 | R172H/+ | fl/fl | fl/fl | +/+   | <b>162</b> | <b>5.4</b> | 10/27/14 | ctrl | Y |    |
| 35 | 701  | 5/18/14  | Wh/RR  | PmPtDA40 | R172H/+ | fl/fl | fl/fl | +/+   | <b>162</b> | <b>5.4</b> | 10/27/14 | ctrl | Y |    |
| 36 | 1698 | 10/7/13  | br/-   | PmPtDA33 | R172H/+ | fl/fl | fl/fl | +/+   | <b>91</b>  | <b>3.0</b> | 1/6/14   | ctrl | Y |    |
| 37 | 1700 | 10/7/13  | Br/l   | PmPtDA33 | R172H/+ | fl/fl | fl/fl | +/+   | <b>91</b>  | <b>3.0</b> | 1/6/14   | ctrl | Y |    |
| 38 | 1701 | 10/7/13  | Br/RL  | PmPtDA33 | R172H/+ | fl/fl | fl/fl | +/+   | <b>91</b>  | <b>3.0</b> | 1/6/14   | ctrl | Y |    |
| 39 | 305  | 2/25/14  | Wh/R   | PmPtDA37 | R172H/+ | fl/fl | fl/fl | +/+   | <b>244</b> | <b>8.1</b> | 10/27/14 | ctrl | Y |    |
| 40 | 303  | 2/25/14  | Bl/-   | PmPtDA37 | R172H/+ | fl/fl | fl/fl | +/+   | <b>244</b> | <b>8.1</b> | 10/27/14 | ctrl | Y |    |
| 41 | 314  | 2/23/14  | Wh/RL  | PmPtDA40 | R172H/+ | fl/fl | fl/fl | +/+   | <b>246</b> | <b>8.2</b> | 10/27/14 | ctrl | Y |    |
| 42 | 710  | 10/19/13 | Br/RL  | PmPtDA33 | R172H/+ | fl/fl | fl/fl | Cre/+ | <b>75</b>  | <b>2.5</b> | 1/2/14   | ET   | Y |    |



|    |     |          |         |          |         |       |       |       |            |             |          |    |   |
|----|-----|----------|---------|----------|---------|-------|-------|-------|------------|-------------|----------|----|---|
| 43 | 270 | 10/18/14 | Br/-    | PmPtDA35 | R172H/+ | fl/fl | fl/fl | Cre/+ | <b>172</b> | <b>5.7</b>  | 4/8/15   | ET | Y |
| 44 | 263 | 10/18/14 | Bl/R    | PmPtDA31 | R172H/+ | fl/fl | fl/fl | Cre/+ | <b>177</b> | <b>5.9</b>  | 4/13/15  | ET | Y |
| 45 | 372 | 11/11/14 | Wh/R    | PmPtDA31 | R172H/+ | fl/fl | fl/fl | Cre/+ | <b>153</b> | <b>5.1</b>  | 4/13/15  | ET | Y |
| 46 | 436 | 11/30/14 | Bl/-    | PmPtDA39 | R172H/+ | fl/fl | fl/fl | Cre/+ | <b>136</b> | <b>4.5</b>  | 4/15/15  | ET | Y |
| 47 | 378 | 11/14/14 | Bl/L    | PmPtDA42 | R172H/+ | fl/fl | fl/fl | Cre/+ | <b>152</b> | <b>5.1</b>  | 4/15/15  | ET | Y |
| 48 | 437 | 11/30/14 | Bl/R    | PmPtDA39 | R172H/+ | fl/fl | fl/fl | Cre/+ | <b>138</b> | <b>4.6</b>  | 4/17/15  | ET | Y |
| 49 | 771 | 2/16/15  | Bl/LL   | PmPtDA42 | R172H/+ | fl/fl | fl/fl | Cre/+ | <b>150</b> | <b>5.0</b>  | 7/16/15  | ET | Y |
| 50 | 786 | 2/22/15  | Bl/RR   | PmPtDA46 | R172H/+ | fl/fl | fl/fl | Cre/+ | <b>157</b> | <b>5.2</b>  | 7/29/15  | ET | Y |
| 51 | 33  | 2/13/16  | Bl/-    | TKO4     | R172H/+ | fl/fl | fl/fl | Cre/+ | <b>122</b> | <b>4.1</b>  | 6/14/16  | ET | Y |
| 52 | 328 | 10/29/14 | Bl/L    | PmPtDA41 | R172H/+ | fl/fl | fl/fl | Cre/+ | <b>172</b> | <b>5.7</b>  | 4/19/15  | LT | Y |
| 53 | 319 | 10/30/14 | Bl/RRLL | PmPtDA38 | R172H/+ | fl/fl | fl/fl | Cre/+ | <b>172</b> | <b>5.7</b>  | 4/20/15  | LT | Y |
| 54 | 244 | 10/6/14  | Br/R    | PmPtDA43 | R172H/+ | fl/fl | fl/fl | Cre/+ | <b>198</b> | <b>6.6</b>  | 4/22/15  | LT | Y |
| 55 | 90  | 9/1/14   | Bl/R    | PmPtDA43 | R172H/+ | fl/fl | fl/fl | Cre/+ | <b>238</b> | <b>7.9</b>  | 4/27/15  | LT | Y |
| 56 | 321 | 10/29/14 | Bl/-    | PmPtDA39 | R172H/+ | fl/fl | fl/fl | Cre/+ | <b>181</b> | <b>6.0</b>  | 4/28/15  | LT | Y |
| 57 | 276 | 10/16/14 | Bl/L    | PmPtDA43 | R172H/+ | fl/fl | fl/fl | Cre/+ | <b>208</b> | <b>6.9</b>  | 5/12/15  | LT | Y |
| 58 | 958 | 8/2/14   | Bl/RL   | PmPtDA30 | R172H/+ | fl/fl | fl/fl | Cre/+ | <b>303</b> | <b>10.1</b> | 6/1/15   | LT | Y |
| 59 | 246 | 10/6/14  | Br/RL   | PmPtDA43 | R172H/+ | fl/fl | fl/fl | Cre/+ | <b>239</b> | <b>8.0</b>  | 6/2/15   | LT | Y |
| 60 | 206 | 5/22/16  | bl/-    | tko3     | R172H/+ | fl/fl | fl/fl | Cre/+ | <b>172</b> | <b>5.7</b>  | 11/10/16 | LT | Y |
| 61 | 123 | 8/24/16  |         | tko3     | R172H/+ | fl/fl | fl/fl | Cre/+ | <b>134</b> | <b>4.5</b>  | 1/5/17   | LT | Y |
| 62 | 179 | 9/2/16   |         | tko11    | R172H/+ | fl/fl | fl/fl | Cre/+ | <b>130</b> | <b>4.3</b>  | 1/10/17  | LT | Y |
| 63 | 312 | 7/3/16   | Bl/L    | TKo8     | R172H/+ | fl/fl | fl/fl | Cre/+ | <b>200</b> | <b>6.7</b>  | 1/19/17  | LT | Y |
| 64 | 197 | 9/2/16   |         | tko11    | R172H/+ | fl/fl | fl/fl | Cre/+ | <b>150</b> | <b>5.0</b>  | 1/30/17  | LT | Y |

10

|    |     |          |      |         |         |       |       |       |            |            |          |    |   |    |
|----|-----|----------|------|---------|---------|-------|-------|-------|------------|------------|----------|----|---|----|
| 65 | 97  | 8/17/16  |      | tko6    | R172H/+ | fl/fl | fl/fl | Cre/+ | <b>174</b> | <b>5.8</b> | 2/7/17   | LT | Y | 16 |
| 66 | 138 | 8/22/16  |      | tko6    | R172H/+ | fl/fl | fl/fl | Cre/+ | <b>171</b> | <b>5.7</b> | 2/9/17   | LT | Y |    |
| 67 | 310 | 7/3/16   | Bl/- | TKo8    | R172H/+ | fl/fl | fl/fl | Cre/+ | <b>221</b> | <b>7.4</b> | 2/9/17   | LT | Y |    |
| 68 | 292 | 10/21/14 | Bl/- | PmfPtA3 | fl/fl   | fl/fl | +/+   | Cre/+ | <b>203</b> | <b>6.8</b> | 5/12/15  | UT | Y | 17 |
| 69 | 337 | 10/28/14 | Bl/R | PmfPtA4 | fl/fl   | fl/fl | +/+   | Cre/+ | <b>203</b> | <b>6.8</b> | 5/19/15  | UT | Y |    |
| 70 | 401 | 11/10/14 | Ag/- | PfPtA10 | fl/fl   | fl/fl | +/+   | Cre/+ | <b>191</b> | <b>6.4</b> | 5/20/15  | UT | Y |    |
| 71 | 35  | 2/8/16   | Bl/- | cptDKO1 | fl/fl   | fl/fl | +/+   | Cre/+ | <b>185</b> | <b>6.2</b> | 8/11/16  | UT | Y |    |
| 72 | 40  | 2/14/16  | Bl/R | cptDKO1 | fl/fl   | fl/fl | +/+   | Cre/+ | <b>179</b> | <b>6.0</b> | 8/11/16  | UT | Y |    |
| 73 | 56  | 2/28/16  | Bl/L | cptDKO1 | fl/fl   | fl/fl | +/+   | Cre/+ | <b>179</b> | <b>6.0</b> | 8/25/16  | UT | Y |    |
| 74 | 148 | 4/30/16  | Ag/- | cptDKO1 | fl/fl   | fl/fl | +/+   | Cre/+ | <b>123</b> | <b>4.1</b> | 8/31/16  | UT | Y |    |
| 75 | 117 | 4/11/16  | Ag/- | cptDKO1 | fl/fl   | fl/fl | +/+   | Cre/+ | <b>166</b> | <b>5.5</b> | 9/24/16  | UT | Y |    |
| 76 | 118 | 4/11/16  | Ag/R | cptDKO1 | fl/fl   | fl/fl | +/+   | Cre/+ | <b>183</b> | <b>6.1</b> | 10/11/16 | UT | Y |    |
| 77 | 32  | 7/29/16  |      | cptDKO2 | fl/fl   | fl/fl | +/+   | Cre/+ | <b>126</b> | <b>4.2</b> | 12/2/16  | UT | Y |    |
| 78 | 258 | 6/23/16  | bl/- | cptDKO2 | fl/fl   | fl/fl | +/+   | Cre/+ | <b>173</b> | <b>5.8</b> | 12/13/16 | UT | Y |    |
| 79 | 332 | 7/6/16   | bl/R | cptDKO2 | fl/fl   | fl/fl | +/+   | Cre/+ | <b>166</b> | <b>5.5</b> | 12/19/16 | UT | Y |    |
| 80 | 183 | 8/29/16  |      | cptDKO2 | fl/fl   | fl/fl | +/+   | Cre/+ | <b>112</b> | <b>3.7</b> | 12/19/16 | UT | Y |    |
| 81 | 182 | 8/29/16  |      | cptDKO2 | fl/fl   | fl/fl | +/+   | Cre/+ | <b>133</b> | <b>4.4</b> | 1/9/17   | UT | Y |    |
| 82 | 246 | 10/1/16  |      | cptDKO2 | fl/fl   | fl/fl | +/+   | Cre/+ | <b>114</b> | <b>3.8</b> | 1/23/17  | UT | Y |    |
| 83 | 33  | 7/29/16  |      | cptDKO2 | fl/fl   | fl/fl | +/+   | Cre/+ | <b>178</b> | <b>5.9</b> | 1/23/17  | UT | Y |    |
| 84 | 151 | 8/22/16  |      | cptDKO2 | fl/fl   | fl/fl | +/+   | Cre/+ | <b>162</b> | <b>5.4</b> | 1/31/17  | UT | Y |    |

## **Additional discussion on the biological roles of identified features not discussed in main manuscript.**

One member of the 29-metabolite panel was tentatively identified as a fatty acid ester derivative ( $C_{26}H_{52}O_6S$ ). This metabolite was significantly elevated in TKO mice (Table 1; fold change: +3.03), suggesting this type of fatty acid derivative could be linked to cancer proliferation. Indeed, increased endogenous fatty acid biosynthesis has been reported in ovarian cancer <sup>1</sup>, and it is well established that cancer cells have increased *de novo* lipid synthesis to meet the needs of tumor growth, therefore relying on FAs as building blocks for membrane formation, energy storage, and the generation of various signaling molecules <sup>2</sup>.

Two compounds in the metabolite panel contained carbohydrate moieties (Table 1): a fatty acyl glucoside ( $C_{11}H_{20}O_6$ ), and an N-acylaminosugar isomer of N-acetylactosamine. The N-acylaminosugar was detected to be highly increased in serum of TKO mice (Table 1, fold change: 2.78). This increase may be due to an increased release of oligosaccharides from glycoproteins by N-acetylglucosaminidase <sup>3</sup>. In agreement with our observations, Dennis *et al.* found that N-linked oligosaccharides in malignant tumor cells were directly associated with metastatic potential. Inhibition of N-linked oligosaccharide processing in malignant cells results in increased susceptibility to natural immunity, increased cell adhesion, and decreased tumor cell invasion <sup>4</sup>. We also detected decreased serum levels of the  $C_{11}H_{20}O_6$  fatty acyl glucoside in TKO mice (Table 1, fold change: -1.98). However, literature searches revealed no mechanism of regulation or biological role of fatty acyl glucosides in ovarian cancer.

Significantly increased serum levels of phosphatidylserine (PS) were detected in TKO mice (Table 1; fold change: +0.16), with higher abundances in TKO-AT mice. Studies have revealed exposed PS as an evolutionarily conserved anti-inflammatory and immunosuppressive signal in the tumor microenvironment <sup>5</sup>. This immunosuppressive effect of exposed PS antagonizes the development of tumor immunity via upregulating immunosuppressive cytokines IL-10 and TGF- $\beta$ , and suppressing activation of T-cell responses <sup>6</sup>, which promotes tumor progression. Elevated PS expression has been reported in human tumor cells <sup>7</sup> and the immunosuppressive effect of PS has been reported in ovarian tumor ascites fluids <sup>6</sup>, suggesting PS as a potential therapeutic target for patients with ovarian cancer.

The metabolite with elemental formula  $C_{20}H_{23}N_7O_7$  was tentatively identified as 5-formyltetrahydrofolate (folinic acid), or its isomer 10-formyltetrahydrofolate (Table 1). Formyltetrahydrofolate is the formyl derivative of tetrahydrofolic acid, which is an active form of folic acid. Formyltetrahydrofolate is a potent inhibitor of several folate-dependent enzymes and regulates folic acid-dependent one-carbon metabolism<sup>8</sup>. Serum levels of formyltetrahydrofolate were found to be increased in TKO mice (Table 1; fold change: +0.75). It is plausible that formyltetrahydrofolate aids the development of ovarian cancer by increasing purine biosynthesis through one-carbon metabolism<sup>9</sup>. Additionally, Girgis *et al.* found that when folinic acid levels were depleted in human 5Y neuroblastoma cells, these cells displayed a 30-40% decrease in proliferation rates<sup>10</sup>.

## References

1. Pizer, E.; Wood, F.; Heine, H.; Romantsev, F.; Pasternack, G.; Kuhajda, F., Inhibition of fatty acid synthesis delays disease progression in a xenograft model of ovarian cancer. *Cancer Res* **1996**, *56* (6), 1189-1193.
2. Currie, E.; Schulze, A.; Zechner, R.; Walther, T.; Farese, R., Cellular Fatty Acid Metabolism and Cancer. *Cell Metab* **2013**, *18* (2), 153-161.
3. Tarentino, A. L.; Plummer, T. H., Jr.; Maley, F., The release of intact oligosaccharides from specific glycoproteins by endo-beta-N-acetylglucosaminidase H. *J Biol Chem* **1974**, *249* (3), 818-824.
4. Dennis, J. W., N-linked oligosaccharide processing and tumor cell biology. *Semin Cancer Biol* **1991**, *2* (6), 411-420.
5. Birge, R.; Boeltz, S.; Kumar, S.; Carlson, J.; Wanderley, J.; Calianese, D.; Barcinski, M.; Brekken, R.; Huang, X.; Hutchins, J.; Freimark, B.; Empig, C.; Mercer, J.; Schroit, A.; Schett, G.; Herrmann, M., Phosphatidylserine is a global immunosuppressive signal in efferocytosis, infectious disease, and cancer. *Cell Death Differ* **2016**, *23* (6), 962-978.
6. Kelleher, R. J., Jr.; Balu-Iyer, S.; Loyall, J.; Sacca, A. J.; Shenoy, G. N.; Peng, P.; Iyer, V.; Fathallah, A. M.; Berenson, C. S.; Wallace, P. K.; Tario, J.; Odunsi, K.; Bankert, R. B., Extracellular Vesicles Present in Human Ovarian Tumor Microenvironments Induce a

Phosphatidylserine-Dependent Arrest in the T-cell Signaling Cascade. *Cancer Immunol Res* **2015**, 3 (11), 1269-1278.

7. Utsugi, T.; Schroit, A. J.; Connor, J.; Bucana, C. D.; Fidler, I. J., Elevated expression of phosphatidylserine in the outer membrane leaflet of human tumor cells and recognition by activated human blood monocytes. *Cancer Res* **1991**, 51 (11), 3062-3066.

8. Stover, P.; Schirch, V., The metabolic role of leucovorin. *Trends Biochem Sci* **1993**, 18 (3), 102-106.

9. Fox, J. T.; Stover, P. J., Folate-mediated one-carbon metabolism. *Vitam Horm* **2008**, 79, 1-44.

10. Girgis, S.; Suh, J.; Jolivet, J.; Stover, P., 5-formyltetrahydrofolate regulates homocysteine remethylation in human neuroblastoma. *J Biol Chem* **1997**, 272 (8), 4729-4734.
